# Supplementary material
Source: publisher site journal article supplement (https://www.spandidos-publications.com/6781/downloadSupplementary)
Supplement: Supplementary file 1 [file downloadSupplementary]

## Sheet: Sheet1
Table SI. Target genes of stigmasterol.
Gene name	Gene symbol
Acetylcholinesterase	ACHE
Low molecular weight phosphotyrosine protein phosphatase	ACP1
Adenosine A3 receptor	ADORA3
Alpha-1B adrenergic receptor	ADRA1B
Beta-1 adrenergic receptor	ADRB1
Aldo-keto reductase family 1 member B10	AKR1B10
Androgen Receptor	AR
Potassium-transporting ATPase alpha chain 2	ATP12A
Butyrylcholinesterase	BCHE
C-C chemokine receptor type 1	CCR1
Cyclin-dependent kinase 4	CDK4
Cyclin-dependent kinase 6	CDK6
Carboxylesterase 2	CES2
Muscarinic acetylcholine receptor M1	CHRM1
Muscarinic acetylcholine receptor M2	CHRM2
Muscarinic acetylcholine receptor M3	CHRM3
C-X-C chemokine receptor type 3	CXCR3
Cytochrome P450 17A1	CYP17A1
Cytochrome P450 19A1	CYP19A1
Cytochrome P450 2C19	CYP2C19
Cytochrome P450 51 (by homology)	CYP51A1
Diacylglycerol O-acyltransferase 1	DGAT1
Anti-estrogen binding site (AEBS) (by homology)	DHCR7
Anti-estrogen binding site (AEBS)	DHCR7 EBP
Estrogen receptor alpha	ESR1
Estrogen receptor beta	ESR2
Thrombin and coagulation factor X	F10
Thrombin	F2
Fatty acid binding protein 1	FABP1
Fatty acid binding protein 3	FABP3
Fatty acid binding protein 4	FABP4
Fatty acid binding protein 5	FABP5
Squalene synthetase (by homology)	FDFT1
Glucose-6-phosphate 1-dehydrogenase	G6PD
Gamma-aminobutyric acid receptor subunit alpha-1	GABRA1
Gamma-aminobutyric acid receptor subunit alpha-3	GABRA3
Vitamin D-binding protein	GC
Glycine receptor subunit alpha-1	GLRA1
Gonadotropin-releasing hormone receptor	GNRHR
Orexin receptor 1	HCRTR1
Orexin receptor 2	HCRTR2
Hypoxia-inducible factor 1 alpha	HIF1A
HMG-CoA reductase	HMGCR
11-beta-hydroxysteroid dehydrogenase 1	HSD11B1
5-hydroxytryptamine receptor 2A	HTR2A
Intercellular adhesion molecule 1	ICAM1
Isoprenylcysteine carboxyl methyltransferase	ICMT
Indoleamine 2,3-dioxygenase	IDO1
Intercellular adhesion molecule (ICAM-1), Integrin alpha-L/beta-2	ITGAL
Integrin beta-2	ITGB2
MAP kinase ERK1	MAPK3
p53-binding protein Mdm-2	MDM2
Protein Mdm4	MDM4
Methionine aminopeptidase 1	METAP1
Nitric oxide synthase, inducible (by homology)	NOS2
Niemann-Pick C1-like protein 1	NPC1L1
LXR-beta	NR1H2
LXR-alpha	NR1H3
Nuclear receptor subfamily 1 group I member 3 (by homology)	NR1I3
Glucocorticoid receptor	NR3C1
Mineralocorticoid receptor	NR3C2
Phosphodiesterase 4A	PDE4A
Phosphodiesterase 4B	PDE4B
Phosphodiesterase 4C	PDE4C
Phosphodiesterase 4D	PDE4D
Progesterone receptor	PGR
Serine/threonine-protein kinase PIM1	PIM1
Serine/threonine-protein kinase PIM3	PIM3
Phospholipase A2 group 1B	PLA2G1B
Urokinase-type plasminogen activator	PLAU
DNA polymerase beta (by homology)	POLB
Peroxisome proliferator-activated receptor alpha	PPARA
Peroxisome proliferator-activated receptor delta	PPARD
Peroxisome proliferator-activated receptor gamma	PPARG
Prolyl endopeptidase	PREP
Protein kinase C eta	PRKCH
Prostanoid DP receptor	PTGDR
Prostanoid EP1 receptor (by homology)	PTGER1
Prostanoid EP2 receptor (by homology)	PTGER2
Prostanoid EP3 receptor	PTGER3
Prostanoid EP4 receptor (by homology)	PTGER4
Prostaglandin E synthase	PTGES
Prostanoid FP receptor	PTGFR
Prostanoid IP receptor	PTGIR
Prostaglandin G/H synthase 1	PTGS1
Protein-tyrosine phosphatase 1B	PTPN1
Protein-tyrosine phosphatase 2C	PTPN11
T-cell protein-tyrosine phosphatase	PTPN2
Protein-tyrosine phosphatase 1C	PTPN6
Receptor-type tyrosine-protein phosphatase F (LAR)	PTPRF
Nuclear receptor ROR-alpha	RORA
Nuclear receptor ROR-gamma	RORC
Sphingosine 1-phosphate receptor Edg-1	S1PR1
Sphingosine 1-phosphate receptor Edg-3	S1PR3
Sodium channel protein type 5 subunit alpha	SCN5A
Corticosteroid binding globulin	SERPINA6
Testis-specific androgen-binding protein	SHBG
Sonic hedgehog protein (by homology)	SHH
Sigma opioid receptor	SIGMAR1
Norepinephrine transporter	SLC6A2
Dopamine transporter	SLC6A3
Serotonin transporter	SLC6A4
Smoothened homolog	SMO
Squalene monooxygenase	SQLE
Steroid 5-alpha-reductase 2	SRD5A2
Sterol regulatory element-binding protein 2	SREBF2
Thromboxane-A synthase	TBXAS1
Telomerase reverse transcriptase	TERT
DNA topoisomerase I	TOP1
DNA topoisomerase II alpha	TOP2A
UDP-glucuronosyltransferase 2B7	UGT2B7
Vitamin D receptor	VDR
